# Supplementary material for: First report of an Onchocercidae worm infecting Psychodopygus carrerai carrerai sandfly, a putative vector of Leishmania braziliensis in the Amazon
Source: PubMed Central journal article supplement (PMC7498610; doi:10.1038/s41598-020-72065-9), 2020-09-17
Supplement: 41598_2020_72065_MOESM2_ESM.pdf [file 41598_2020_72065_MOESM2_ESM.pdf]

## Supplementary information

### **First report of an Onchocercidae worm infecting *Psychodopygus carrerai carrerai* sandfly, a putative vector of *Leishmania braziliensis* in the Amazon**

Andreia Fernandes Brilhante<sup>1,7</sup>, Alessandra Lima de Albuquerque<sup>2</sup>, Abraham César de Brito Rocha<sup>3,4</sup>, Constância Flávia Junqueira Ayres<sup>2\*</sup>, Marcelo Henrique Santos Paiva<sup>2,5</sup>, Márcia Moreira de Ávila<sup>6</sup>, Cristiane de Oliveira Cardoso<sup>7</sup>, Isabel L. Mauricio<sup>8</sup>, Eunice Aparecida Bianchi Galati<sup>1</sup>.

<sup>1</sup> Public Health School, Epidemiology Department, University of São Paulo, São Paulo, Brazil. Email: [brilhanteaf@usp.br](mailto:brilhanteaf@usp.br) ; [egalati@usp.br](mailto:egalati@usp.br)

<sup>2</sup> Entomology Department, Aggeu Magalhães Institute, Oswaldo Cruz Foundation, Recife, Pernambuco, Brazil. Email: [ale@cpqam.fiocruz.br](mailto:ale@cpqam.fiocruz.br) ; [tans@cpqam.fiocruz.br](mailto:tans@cpqam.fiocruz.br) ; [marceloh@cpqam.fiocruz.br](mailto:marceloh@cpqam.fiocruz.br)

<sup>3</sup> National Center of Lymphatic Filariasis, Parasitology Department, Aggeu Magalhães, Institute, Oswaldo Cruz Foundation, Recife, Pernambuco, Brazil. Email: [rocha@cpqam.fiocruz.br](mailto:rocha@cpqam.fiocruz.br)

<sup>4</sup> Laboratory of Hospital Otávio de Freitas – Department of Health of the State of Pernambuco

<sup>5</sup> Federal University of Pernambuco, Núcleo de Ciências da Vida - Centro Acadêmico do Agreste, Caruaru, Pernambuco, Brazil.

<sup>6</sup> Federal Institute of Acre, Rio Branco, Acre, Brazil. Email: [marcia.avila@ifac.edu.br](mailto:marcia.avila@ifac.edu.br)

<sup>7</sup> Center for Health and Sport Sciences, Federal University of Acre, Rio Branco, Acre, Brazil. Email: [crisdeocardoso@gmail.com](mailto:crisdeocardoso@gmail.com)

<sup>8</sup> Global Health and Tropical Medicine (GHTM), Instituto de Higiene e Medicina Tropical, Universidade Nova de Lisboa (UNL), Lisboa, Portugal. Email: [isabel.mauricio@ihmt.unl.pt](mailto:isabel.mauricio@ihmt.unl.pt)

\*Correspondence and requests for materials should be addressed to Constância Flávia Junqueira Ayres (email: [tans@cpqam.fiocruz.br](mailto:tans@cpqam.fiocruz.br))

**Supplementary Video.** Video of a female specimen of *Ps. carrerai carrerai* parasitized with an Onchocercidae worm larvae form.

**List of Supplementary Figures:**

**Figure S1** - A network generated by the NeighborNet algorithm in the program SplitsTree, derived from Kimura-2-parameter distances of ITS sequences. The worm sequence from Xapuri and indistinguishable sequences are highlighted in red on the network.

**Figure S2** - Alignment of the most similar sequences to Xapuri ITS obtained through a BLAST search and used to produce **Figure S1**. Sequences were aligned through Clustal X in BioEdit42, using default settings, and with gaps and regions of uncertain alignment removed manually. If more than one sample corresponded to each sequence it is indicated with a superscript number, as follows. 1 Xapuri ITS; AF228576.1 *O. volvulus*; KR080190.1 *Loa loa*; JQ327149.1 *Brugia malayi*; JQ316671.1 *Onchocerca fasciata*; EU419347.1 *Brugia malayi*; EU272178.1 *Wuchereria bancrofti*. 2 HG005138.1 *Acanthocheilonema spirocauda*; AF217801.2 *Dipetalonema reconditum*. 3 LN869521.1 Onchocercidae sp.; LN869520.1 Onchocercidae sp.; KY586137.1 Onchocercidae sp.. 4 LT623912.1 *Mansonella ozzardi*; LT623911.1 *Mansonella perstans*; KR080186.1 *Mansonella* sp.; KR080185.1 *Mansonella* sp.. 5 KX944557.1 *Malayfilaria sofiani*; KU757075.1 *Setaria yehi*. 6 EU087700.1 *Dirofilaria immitis*; AY621481.1 *Dirofilaria repens*.

**Supplementary information 1.** Alignment 12S – Nucleotide alignment of the 12S gene used in the phylogenetic analysis represented in Fig. 2.

**Supplementary information 2.** Alignment COI – Nucleotide alignment of the COI gene used in the phylogenetic analysis represented in Fig 3.

Figure S1

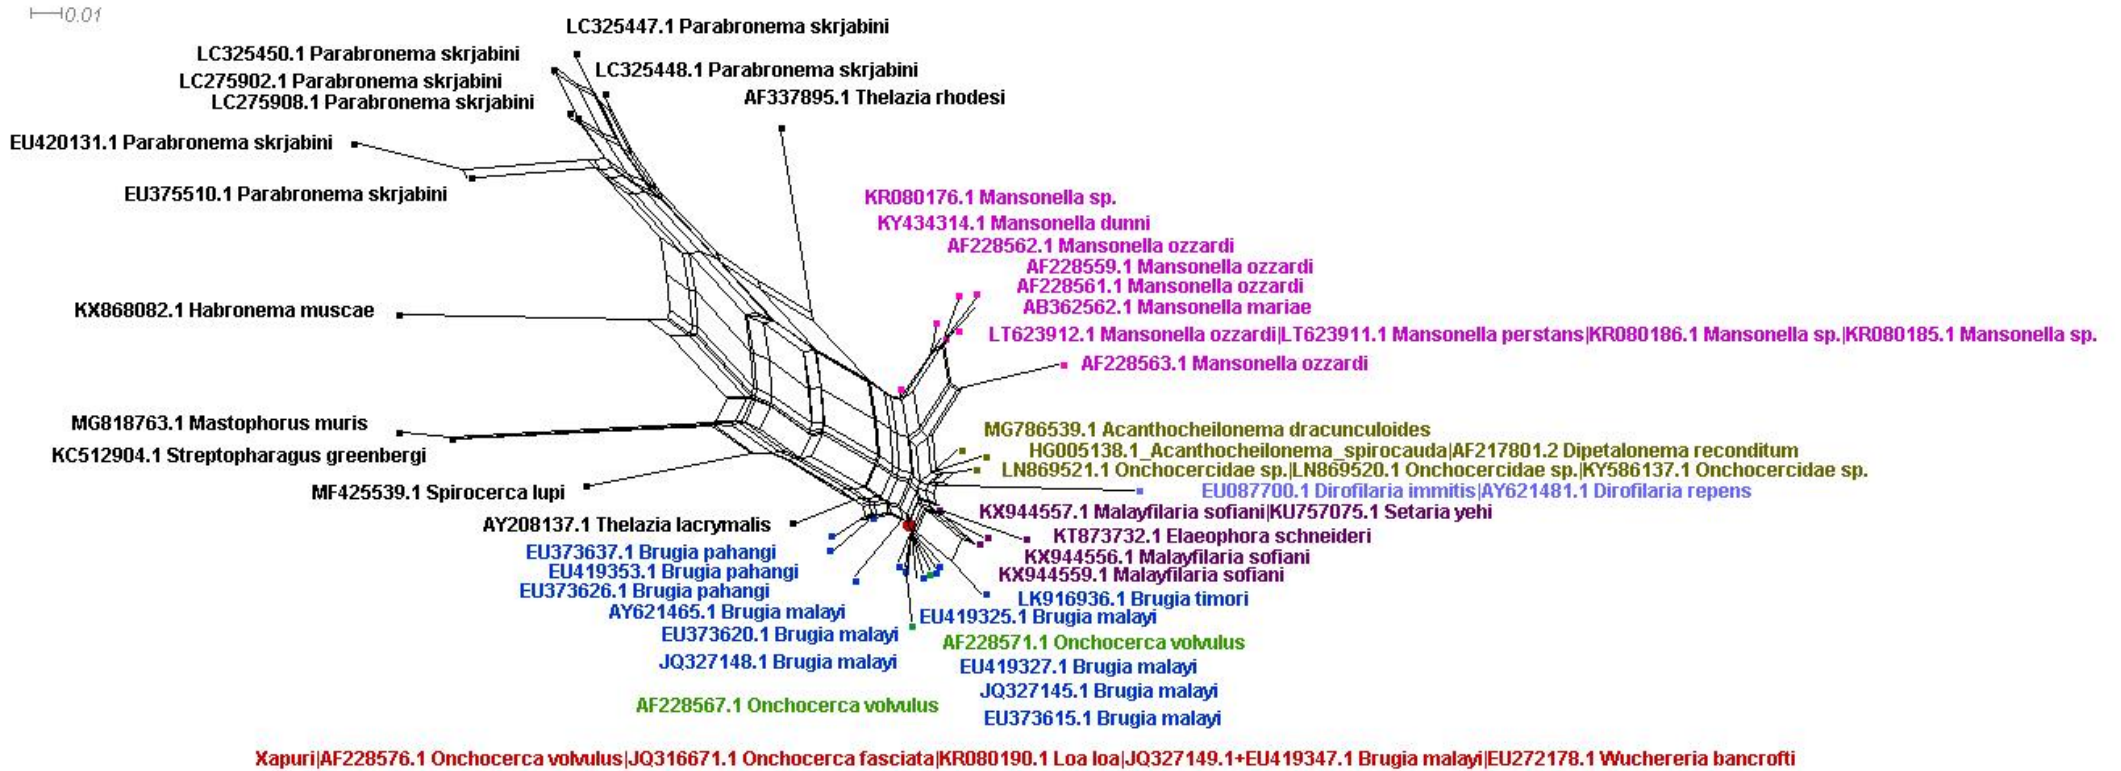

## Figure S2

Position

Xapuri ITS<sup>1</sup>

|                                                             | 10      | 20      | 30          | 40         | 50        | 60                       |
|-------------------------------------------------------------|---------|---------|-------------|------------|-----------|--------------------------|
| Xapuri ITS <sup>1</sup>                                     | AAACGGT | GATTGGT | GTCTATACTTT | TATCCAAGTT | ATCGCCCCG | TGCATAACAATGAAGATAAAGCGA |
| AF228571.1 <i>Onchocerca volvulus</i>                       |         |         |             |            |           | G                        |
| AF228567.1 <i>Onchocerca volvulus</i>                       |         | C       |             | C          |           |                          |
| LK916936.1 <i>Brugia timori</i>                             |         |         |             |            | G         | T                        |
| JQ327148.1 <i>Brugia malayi</i>                             |         | C       |             |            |           |                          |
| JQ327145.1 <i>Brugia malayi</i>                             |         |         |             | C          |           |                          |
| EU419327.1 <i>Brugia malayi</i>                             |         |         |             |            | T         |                          |
| EU419325.1 <i>Brugia malayi</i>                             |         |         |             |            |           | C                        |
| EU373620.1 <i>Brugia malayi</i>                             |         |         |             |            |           | G                        |
| EU373615.1 <i>Brugia malayi</i>                             |         |         | C           |            |           |                          |
| EU419353.1 <i>Brugia pahangi</i>                            | T       |         |             |            |           |                          |
| EU373637.1 <i>Brugia pahangi</i>                            | T       |         | G           |            |           |                          |
| EU373626.1 <i>Brugia pahangi</i>                            | G       | T       |             |            |           |                          |
| MG786539.1 <i>Acanthocheilonema dracunculoides</i>          |         |         |             |            | G         | G                        |
| HG005138.1 <i>Acanthocheilonema spirocauda</i> <sup>2</sup> |         |         |             |            | G         | G                        |
| LN869521.1 <i>Onchocercidae</i> sp. <sup>3</sup>            |         |         | A           |            |           | G                        |
| LT623912.1 <i>Mansonella ozzardi</i> <sup>4</sup>           | T       |         |             | A          |           | TG                       |
| AF228563.1 <i>Mansonella ozzardi</i>                        | T       | A       |             | A          | A         | G                        |
| AF228562.1 <i>Mansonella ozzardi</i>                        | T       |         | G           | A          |           | TG                       |
| AF228561.1 <i>Mansonella ozzardi</i>                        | T       |         | A           | A          |           | TG                       |
| AF228559.1 <i>Mansonella ozzardi</i>                        | T       | C       |             | A          |           | TG                       |
| KR080176.1 <i>Mansonella</i> sp.                            |         |         |             | A          |           | T                        |
| KY434314.1 <i>Mansonella dunni</i>                          | T       |         | T           | A          |           | TG                       |
| KX944559.1 <i>Malayfilaria sofiani</i>                      |         |         | T           |            |           | T                        |
| KX944557.1 <i>Malayfilaria sofiani</i> <sup>5</sup>         |         |         | T           |            |           |                          |
| KX944556.1 <i>Malayfilaria sofiani</i>                      |         | C       |             | T          |           |                          |
| KT873732.1 <i>Elaeophora schneideri</i>                     |         |         | GT          |            | T         |                          |
| AY621465.1 <i>Brugia malayi</i>                             | G       |         |             | G          |           |                          |
| AB362562.1 <i>Mansonella mariae</i>                         | T       | T       |             | A          |           | TG                       |
| EU087700.1 <i>Dirofilaria immitis</i> <sup>6</sup>          |         | T       | T           |            | G         | G                        |
| AY208137.1 <i>Thelazia lacrymalis</i>                       |         | T       | T           |            | TG        |                          |
| MF425539.1 <i>Spirocerca lupi</i>                           |         | T       | T           | T          | G         | A                        |
| AF337895.1 <i>Thelazia rhodesi</i>                          | T       | T       | T           | T          | T         | T                        |
| KC512904.1 <i>Streptopharagus greenbergi</i>                | C       | T       | C           | AT         | C         | G                        |
| KX868082.1 <i>Habronema muscae</i>                          | C       | T       |             | A          | G         | TTG                      |
| MG818763.1 <i>Mastophorus muris</i>                         | C       | T       | C           | AT         | CG        | G                        |
| LC275908.1 <i>Parabronema skrjabini</i>                     | C       | C       |             | C          | TTG       | A                        |
| LC275902.1 <i>Parabronema skrjabini</i>                     | C       | C       |             | C          | TTG       | T                        |
| LC325448.1 <i>Parabronema skrjabini</i>                     | C       | C       |             | C          | TT        | T                        |
| LC325447.1 <i>Parabronema skrjabini</i>                     | C       | G       | C           | C          | TT        | A                        |
| LC325450.1 <i>Parabronema skrjabini</i>                     | C       | C       |             | C          | TTG       | A                        |
| EU375510.1 <i>Parabronema skrjabini</i>                     | C       | T       |             | C          | TGG       | A                        |
| EU420131.1 <i>Parabronema skrjabini</i>                     | C       | T       |             | CG         | TGG       | A                        |

10                    20                    30                    40                    50                    60

GU138699.1 *Setaria digitata* mi T T A T T T C - A T T T T T T - G T A A A A T A T T T T G G T T T T T T T - T T T T T G A A A A A G - T G C

AF538716.1 *Brugia malayi* mitoc T T A T G T T - A T T T T T - G T A A A A T G T T T T A G T T T T T T T T A - T T A T T T G A A G A G A - C A A

AP017686.1 *Brugia timori* mitoc T T A T G T T - A T T T T T - G T A A A A T G T T T T A G T T T T T C T T A - T T A T T T A A A A A G A - T A A

KP760318.1 *Brugia pahangi* vouc T T A T G T T - A T T T T T - G T A A A A T G T T T T A G T T T T T A T - A - T T T T T T A A A A A G A - C A T

JN367461.1 *Wuchereria bancrofti* ATAT - TT - A T T T T T - G T A A A A T G T T T T A G T T T T T T T - A - T T T T T T G A A A A G A - C A C

KP760339.1 *Loa loa* voucher 80Y T T A T A T T - A T T T T T - G T A A A A T G T T T T A A T T T T A T T A - T A T T T T T - T A A A G A - T A T

JF412320.1 Onchocercidae cf. M N T A T T T T A A T T T T T T - G T A A A A T G T T T T A G T T T A - T T T T - T G T T T T G A G G A A A - T A C

KP760340.1 *Mansonella ozzardi* N T A T T T T A A A T T T T T - G T A A A A T G T T T T A G T T T A - T T T T - T G T T T T G R G G A A A - T A C

LT623914.1 *Mansonella ozzardi* N T A T T T T A A T T T T T T - G T A A A A T G T T T T A G T T T A - T T T T - T G T T T T G A G G A A A - T A C

LT623913.1 *Mansonella perstans* N T A T T T T G A T T T T T T - G T A A A A T A T T T C A A T T T - T T T T - T T T T T T A A A A A A - T T T

AM779823.1 *Mansonella atelensi* N N N N T T - A A T T T T T T T T G T A A A A T A T T T T A A T T T T A T T T - T T C T T T T G G A A A A A - T G T

AM779802.1 *Mansonella perforat* N T A T T T T A A T T T T T T - G T A A A A T A T T T T A A T T T T - A T T T - T A C T T T G A G A A G A - T A T

FR827906.1 *Foleyella candezei* T T A T T T T - A T T T T T - G T A A A A T A T T T T A A T T T T - T T C - T T T T T T G T G A A - G A T A T

HM773029.1 *Chandlerella quisca* N T A T T T T - T T G T T T T T T G T A A A A T A T T T C A A T T T T T T T T T G - A - T T T A T A A A A G A T G T

KX265050.1 *Dirofilaria* sp. 'ho T T A T G T T - T T T T T T T - G T A A A A T G T T T T G A T T T T T T T - G T A T T T T T T T G T A A - - - T A T

KX265091.1 *Dirofilaria repens* T T A T G T T - T T T T T T T - G T A A A A T G T T T T G A T T T T T T T - G T A T T T T T T T G T A A - - - T A T

AJ537512.1 *Dirofilaria immitis* T T A T G T T - T T T T T T T - G T A A A A T A T T T T A A A T T T A T T T - A T G T T T T T T T G T A A - - - T A T

MK391042.1 *Onchocerca flexuosa* T T A A G T T - A T T T T T T - G T A A A A T A T T T T A A T T T T T A T T A T - T T T T T A T T G T G G - T A T

MK391041.1 *Onchocerca flexuosa* T T A A G T T - A T T T T T T - G T A A A A T A T T T T A A T T T T T A T T A T - T T T T T A T T G T G G - T A T

MK391038.1 *Onchocerca flexuosa* T T A A G T T - A T T T T T T - G T A A A A T A T T T T A A T T T T T A T T A T - T T T T T G T T G T G G - T A T

LT732683.1 *Onchocerca flexuosa* T T A A G T T - A T T T T T T - G T A A A A T A T T T T A A T T T T T A T T A T - T T T T T G T T G T G G - T A T

LT732682.1 *Onchocerca flexuosa* T T A A G T T - A T T T T T T - G T A A A A T A T T T T A A T T T T T A T T A T - T T T T T G T T G T G G - T A T

MK391037.1 *Onchocerca flexuosa* T T A A G T T - A T T T T T T - G T A A A A T A T T T T A A T T T T T A T T A T - T T T T T G T T G T G G - T A T

MK391033.1 *Onchocerca flexuosa* T T A A G T T - A T T T T T T - G T A A A A T A T T T T A A T T T T T A T T A T - T T T T T G T T G T G G - T A T

HQ214004.1 *Onchocerca flexuosa* T T A A G T T - A T T T T T T - G T A A A A T A T T T T A A T T T T T A T T A T - T T T T T G T T G T G G - T A T

MK391034.1 *Onchocerca flexuosa* T T A A G T T - A T T T T T T - G T A A A A T A T T T T A A T T T T T A T T A T - T T T T T G T T G T G G - T A T

MK391043.1 *Onchocerca flexuosa* T T A A G T T - A T T T T T T - G T A A A A T A T T T T A A T T T T T A T T A T - T T T T T G T T G T G G - T A T

AP017692.1 *Onchocerca flexuosa* T T A A G T T - A T T T T T T - G T A A A A T A T T T T A A T T T T T A T T A T - T T T T T G T T G T G G - T A T

AB972362.1 *Onchocerca takaokai* T T A T A T T - A T T T T T T - G T A A A A T A T T T T A A T T T A T T T T T - T T T T T G T T G A G A - T A T

AB972364.1 *Onchocerca takaokai* T T A T A T T - A T T T T T T - G T A A A A T A T T T T A A T T T A T T T T T - T T T T T G T T G A G A - T A T

AB972363.1 *Onchocerca takaokai* T T A T A T T - A T T T T T T - G T A A A A T A T T T T A A T T T A T T T T T - T T T T T G T T G A G A - T A T

MH049488.1 *Onchocerca* sp. A AL T T A T G T T T A T T T T T T - G T A A A A T A T T T T G A T T T A T T T T T - A T T T T T - T T A A G A - T G T

AM779811.1 *Onchocerca suzukii* T T A T A T T T A T T T T T T - G T A A A A T G T T T T A A T T T A T T T T T G T - T T T T T T T T T G A G A - T A T

AM779812.1 *Onchocerca suzukii* T T A T A T T T A T T T T T T - G T A A A A T G T T T T A A T T T A T T T T T G T - T T T T T T T T T G A G A - T A T

AB518879.1 *Onchocerca* sp. type T T A - C T T T A T T T T T T - G T A A A A T G T T T T A A T T T G A T T T T G - T T T T T - T T A A G A - T A T

AB518877.1 *Onchocerca* sp. type T T A - C T T T A T T T T T T - G T A A A A T G T T T T A A T T T G A T T T T G - T T T T T - T T A A G A - T A T

AB518878.1 *Onchocerca* sp. type T T A - C T T T A T T T T T T - G T A A A A T G T T T T A A T T T G A T T T T G - T T T T T - T T A A G A - T A T

KC167341.1 *Onchocerca ramachan* T T A T G T T - A T T T T T T - G T A A A A T A T T T T A A T T T A T T A T T - T T T T T T T T G G A G A - T G T

KC167340.1 *Onchocerca ramachan* T T A T G T A T A T T T T T T - G T A A A A T A T T T T A A T T T A T T A T T - T T T T T T T T G G A G A - T G T

JX075208.1 *Onchocerca cerviped* T T A T G T T - A T T T T T T - G T A A A A T A T T T T A A T T T G T T T T - A T T T T T T T A A A G - T G T

JX075207.1 *Onchocerca cerviped* T T A T G T T - A T T T T T T - G T A A A A T A T T T T A A T T T G T T T T - A T T T T T T T A A A G - T G T

KP760345.2 *Onchocerca armillat* T T A T G T T - A T T T T T T - G T A A A A T G T T T T A A C T T T T T T T T T T - A T T T T T T - G A A G - T A T

KX853314.1 *Onchocerca armillat* T T A T G T T - A T T T T T T - G T A A A A T G T T T T A A C T T T T T T T T T T - A T T T T T T - G A A G - T A T

JN863696.1 *Onchocerca lupi* iso T T A T G T T - A T T T T T T - G T A A A A T A T T T T G A T T T G T T T A T T - T T T T T T T T T T T G G - T A T

GU365879.1 *Onchocerca lupi* 12S T T A T G T T - A T T T T T T - G T A A A A T A T T T T G A T T T G T T T A T T - T T T T T T - T T - T G G - T A T

AY462913.1 *Onchocerca gibsoni* T T A T G T T - A T T T T T T - G T A A A A T A T T T T A G T T T T T T T T T T - G T T T T C T T G T G G - T A T

AY462912.1 *Onchocerca gibsoni* T T A T G T T - A T T T T T T - G T A A A A T A T T T T A G T T T T T T T T T T - G T T T T C T T G T G G - T A T

MN985128.1 *Onchocerca fasciata* T T A T G T T - A T T T T T T - G T A A A A T A T T T T A G T T T T T T T T - A T - G T T T T C T T A T G G - T A T

MN985127.1 *Onchocerca fasciata* T T A T G T T - A T T T T T T - G T A A A A T A T T T T A G T T T T T T T T - A T - G T T T T C T T A T G G - T A T

JX075213.1 *Onchocerca* sp. QSM- T T A T G T T - A T T T T T T - G T A A A A T A T T T T A G T T T T T T T T T T - G T T T T C T T G T G A - T A T

JX075215.1 *Onchocerca* sp. QSM- T T A T G T T - A T T T T T T - G T A A A A T A T T T T A G T T T T T T T T T T - G T T T T C T T G T G A - T A T

JX075211.1 *Onchocerca* sp. QSM- T T A T G T T - A T T T T T T - G T A A A A T A T T T T A G T T T T T T T T T T - G T T T T C T T G T G A - T A T

AY462926.1 *Onchocerca linealis* T T A C G T T - A T T T T T T - G T A A A A T A T T T T A G T T T T T T T T - A G T T T - C T T G T G G - T A T

AY462927.1 *Onchocerca linealis* T T A C G T T - A T T T T T T - G T A A A A T A T T T T A G T T T T T T T T - A G T T T - C T T G T G G - T A T

AY462924.1 *Onchocerca linealis* T T A C G T T - A T T T T T T - G T A A A A T A T T T T A G T T T T T T T T - A G T T T - C T T G T G G - T A T

AY462923.1 *Onchocerca gutturos* T T A T G T T - A T T T T T T - G T A A A A T G T T T T A G G T T T T T T T T T - G T T T T G T T G T G A - T A T

KX181290.2 *Onchocerca ochengi* T T A T G T T - G T T T T T T - G T A A A A T G T T T T G A T T T T T T T T - A G T T T - C T T G T G G - T A T

KC167337.1 *Onchocerca* sp. 'Sii T T A T G T T - G T T T T T T - G T A A A A T G T T T T G A T T T T T T T T - A G T T T - C T T G T G G - T A T

KC167338.1 *Onchocerca* sp. 'Sii T T A T G T T - G T T T T T T - G T A A A A T G T T T T G A T T T T T T T T - A G T T T - C T T G T G G - T A T

KC167333.1 *Onchocerca ochengi* T T A T G T T - G T T T T T T - G T A A A A T A T T T T G A T T T T T T T T T T - A G T T T - C T T G T G G - T A T

KC167334.1 *Onchocerca ochengi* T T A T G T T - G T T T T T T - G T A A A A T A T T T T A T T T T T T T T T T - T A G T T T - C T T G T G G - T A T

AY462914.1 *Onchocerca ochengi* T T A T G T T - G T T T T T T - G T A A A A T A T T T T G A T T T T T T T T T - A G T T T - C T T G T G G - T A T

AY462915.1 *Onchocerca ochengi* T T A T G T T - G T T T T T T - G T A A A A T A T T T T G A T T T T T T T T T - A G T T T - C T T G T G G - T A T

FM206484.1 *Onchocerca ochengi* T T A T G T T - G T T T T T T - G T A A A A T A T T T T G A T T T T T T T T T - A G T T T - C T T G T G G - T A T

AY462916.1 *Onchocerca ochengi* T T A T G A T - G T T T T T T - G T A A A A T A T T T T G A T T T T T T T T T - A G T T T - C T T G T G G - T A T

AY462917.1 *Onchocerca ochengi* T T A T G T T - G T T T T T T - G T A A A A T A T T T T G A T T T T T T T T T - A G T T T - C T T G T G G - T A T

AP017694.1 *Onchocerca ochengi* T T A T G T T - G T T T T T T - G T A A A A T A T T T T G A T T T T T T T T - A G T T T - C T T G T G G - T A T

NC\_031891.2 *Onchocerca ochengi* T T A T G T T - G T T T T T T - G T A A A A T A T T T T G A T T T T T T T T - A G T T T - C T T G T G G - T A T

KX181289.2 *Onchocerca ochengi* T T A T G T T - G T T T T T T - G T A A A A T A T T T T G A T T T T T T T T - A G T T T - C T T G T G G - T A T

AP017693.1 *Onchocerca ochengi* T T A T G T T - G T T T T T T - G T A A A A T A T T T T G A T T T T T T T T - A G T T T - C T T G T G G - T A T

AP017695.1 *Onchocerca volvulus* T T A T A T T - G T T T T T T - G T A A A A T A T T T T A A T T T T T T T T T - G G T T T - C T T A T G G - T A T

AF015193.1 *Onchocerca volvulus* T T A T A T T - G T T T T T T - G T A A A A T A T T T T A A T T T T T T T T T T - A G T T T - C T T A T G G - T A T

AY462920.1 *Onchocerca volvulus* T T A T A T T - G T T T T T T - G T A A A A T A T T T T A A T T T T T T T T T T - A G T T T - C T T A T G G - T A T

KT599912.1 *Onchocerca volvulus* T T A T A T T - G T T T T T T - G T A A A A T A T T T T A A T T T T T T T T T T - A G T T T - C T T A T G G - T A T

KC167339.1 *Onchocerca volvulus* T T A T A T T - G T T T T T T - G T A A A A T A T T T T A A T T T T T T T T T T - A G T T T - C T T A T G G - T A T
